# Supplementary material for: Electrospun nanofibers of polyelectrolyte–surfactant complexes for antibacterial wound dressing application
Source: Royal Society of Chemistry journal article supplement (doi:10.1039/c9sm02043h), 2019-01-01
Supplement: c9sm02043h1.pdf [file c9sm02043h1.pdf]

## **Electrospun nanofibers of polyelectrolyte-surfactant complexes for antibacterial wound dressing application**

**Qiaohua Qiu <sup>a</sup>, Jiajun Wu <sup>a</sup>, Zhenzhen Quan <sup>a, b</sup>, Hongnan Zhang <sup>a</sup>, Xiaohong  
Qin <sup>a, \*</sup>, Rongwu Wang <sup>a</sup>, Jianyong Yu <sup>b</sup>**

### **1 The released content of CTAC from PESCs nanofibrous membranes**

The released content of cetyltrimethylammonium chloride (CTAC) from PESCs nanofibrous membranes was determined by ultraviolet spectrophotometer. In weak acidic medium, quaternary ammonium salt as a kind of cationic surfactants can react with water-soluble eosin Y to form an ion-association complex, and the absorbance of color reaction can be measured by UV-visible spectrophotometer at 547 nm (Figure S1).

The CTAC (50 mg/L) and eosin Y solution (30 mg/L) were respectively prepared and the quaternary ammonium salt solution was gradually diluted with eosin Y solution to series of standard solution at concentration of 0.5, 1, 2, 3, 4, 5 mg/L, respectively. The standard curve was prepared by ultraviolet spectrophotometer at 547 nm (UV, PerkinElmer- Lambda 35).

The released content of CTAC at predetermined time intervals was measured according to the standard curve (Figure S2).

---

*a. Key Laboratory of Textile Science & Technology of Ministry of Education, College of Textiles, Donghua University, Shanghai 201620, China;*

*b. Innovation Center for Textile Science and Technology, Donghua University, Shanghai 201620, China.*

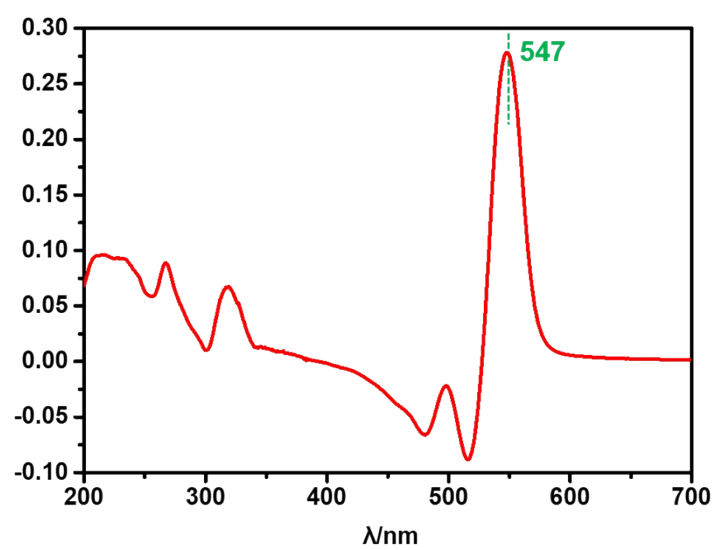

**Figure S1.** Absorption spectrogram of CTAC and eosin Y.

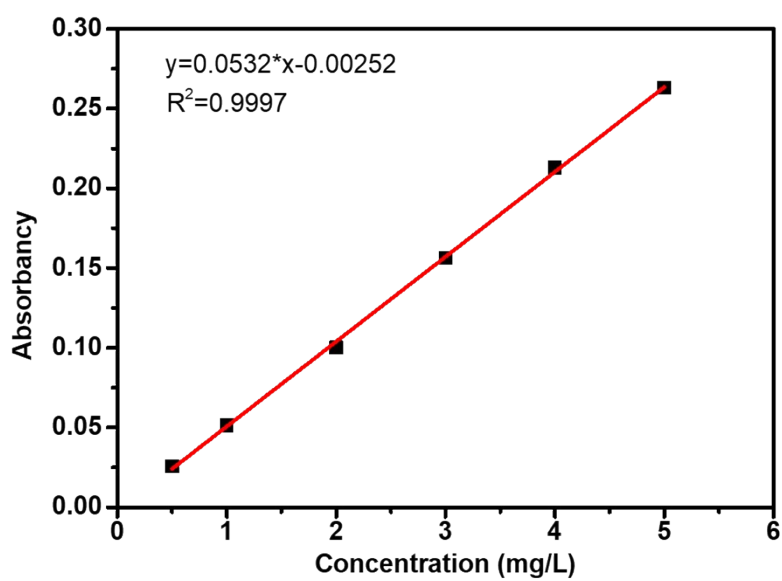

**Figure S2.** Standard curve of CTAC and eosin Y.

**2  $^1\text{H}$  NMR spectra of CTAC, HPAN and PESCs**

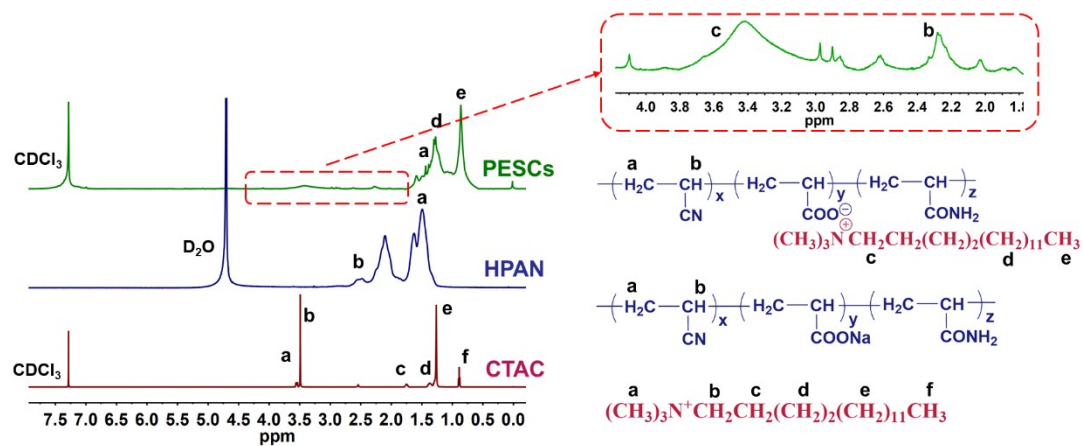

**Figure S3.**  $^1\text{H}$  NMR spectra of CTAC, HPAN, and PESCs.

### 3 Inhibition zone method

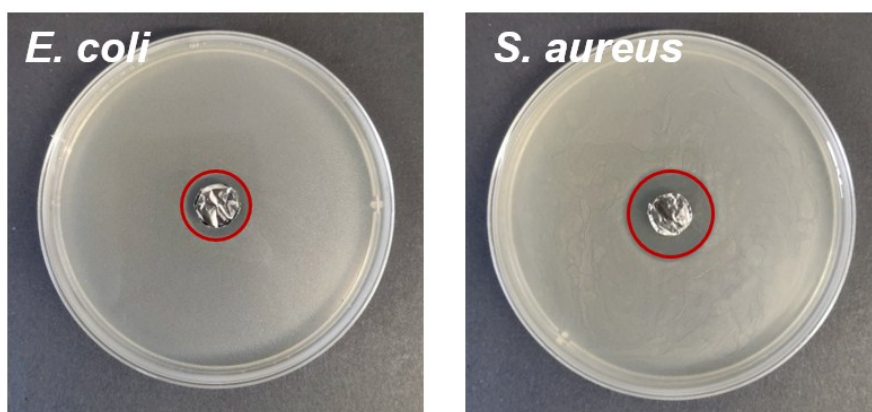

**Figure S4.** Inhibition zone of PESCs nanofibrous membranes.
